# Supplementary material for: DNA copy number changes define spatial patterns of heterogeneity in colorectal cancer
Source: PubMed Central journal article supplement (PMC5288500; doi:10.1038/ncomms14093), 2017-01-25
Supplement: ncomms14093-s1.pdf [file ncomms14093-s1.pdf]

| Patient ID | Healthy tissue | Primary colon               | Primary rectal          | Lymph node | Liver    | lung     | Soft tissue | Ovary | Uterus   | Skin          | Brain    | Retroperitoneum | Rectum   | Small bowel |
|------------|----------------|-----------------------------|-------------------------|------------|----------|----------|-------------|-------|----------|---------------|----------|-----------------|----------|-------------|
| D002       | D002N          | D002P72                     |                         |            |          |          |             |       |          | D002M073.1neu |          | D002M026        |          |             |
|            |                |                             |                         |            |          |          |             |       |          | D002M073.2    |          |                 |          |             |
| D003       | D003N          |                             | D003P005                |            | D003M006 |          |             |       |          |               |          |                 |          |             |
| D004       | D004N          | D004P007                    |                         |            | D004M008 |          |             |       |          |               |          |                 |          |             |
|            |                |                             |                         |            | D004M009 |          |             |       |          |               |          |                 |          |             |
|            |                |                             |                         |            | D004M010 |          |             |       |          |               |          |                 |          |             |
| D005       | D005N          |                             | D005P011.1 (mucineous)  |            |          |          |             |       |          |               |          |                 | D005M013 |             |
|            |                |                             | D005P011.2 (siegelring) |            |          |          |             |       |          |               |          |                 |          |             |
| D007       | D007N          | D007P017                    |                         | D007M018   |          |          |             |       | D007M019 |               |          |                 | D007M025 |             |
| D008       | D008N          | D008P020                    |                         | D008M021   |          |          | D008M022    |       |          |               |          |                 |          |             |
| D010       | D010N          | D010P027                    |                         | D010M028.1 | D010M029 |          |             |       |          |               |          |                 |          |             |
|            |                |                             |                         | D010M028.2 |          |          |             |       |          |               |          |                 |          |             |
|            |                |                             |                         | D010M028.3 |          |          |             |       |          |               |          |                 |          |             |
| D011       | D011N          | D011P030                    |                         | D011M074   | D011M32  |          |             |       |          |               |          |                 |          |             |
|            |                |                             |                         | D011M075   |          |          |             |       |          |               |          |                 |          |             |
| D014       | D014N          |                             | D014P036                | D014M076   |          |          |             |       |          |               |          |                 |          |             |
| D015       | D015N          | D015P038                    |                         | D015M078   | D015M040 |          |             |       |          |               |          |                 |          |             |
|            |                |                             |                         | D015M079   |          |          |             |       |          |               |          |                 |          |             |
|            |                |                             |                         | D015M080   |          |          |             |       |          |               |          |                 |          |             |
| D016       | D016N          | D016P041                    |                         | D016M042   |          |          |             |       |          |               |          |                 |          |             |
| D017       | D017N          | D17P43-1 (block1)           |                         | D17M44     | D17M81   |          |             |       |          |               |          |                 |          |             |
|            |                | D17P43-2 (block2)           |                         | D17M44.2   |          |          |             |       |          |               |          |                 |          |             |
|            |                | D17P43.3 (block3)           |                         | D17M44.3   |          |          |             |       |          |               |          |                 |          |             |
| D018       | D018N          | D018P046                    |                         |            | D018M082 |          |             |       |          |               |          |                 |          |             |
|            |                |                             |                         |            | D018M083 |          |             |       |          |               |          |                 |          |             |
| D019       | D019N          | D019P048                    |                         | D019M049.1 | D019M050 |          |             |       |          |               |          |                 |          |             |
|            |                |                             |                         | D019M049.2 |          |          |             |       |          |               |          |                 |          |             |
| D020       | D020N          | D020P051                    |                         |            |          |          |             |       | D020M052 |               |          |                 | D020M053 |             |
| D021       | D021N          | D021P054.1 (papillary)      |                         | D021M055.2 |          |          |             |       |          |               |          |                 |          |             |
|            |                | D021P054.2 (adenocarcinoma) |                         | D021M055.5 |          |          |             |       |          |               |          |                 |          |             |
| D022       | D022N          |                             | D022P056                | D022M057.1 |          |          |             |       |          |               |          |                 |          |             |
|            |                |                             |                         | D022M057.2 |          |          |             |       |          |               |          |                 |          |             |
| D023       | D023N          | D023P058                    |                         |            | D023M059 |          |             |       |          |               |          |                 |          |             |
| D026       | D026N          | D026P064                    |                         | D026M065.1 |          |          |             |       |          |               |          |                 | D026M066 |             |
|            |                |                             |                         | D026M065.2 |          |          |             |       |          |               |          |                 |          |             |
|            |                |                             |                         | D026M065.3 |          |          |             |       |          |               |          |                 |          |             |
| D027       | D027N          |                             | D027P067                | D027M068   |          | D027M085 |             |       |          |               | D027M070 |                 |          |             |
| D028       | D028N          | D028P087                    |                         | D028M088   |          |          |             |       |          |               |          |                 | D028M093 |             |
| D030       | D030N          |                             | D030P091                | D030M092   |          |          |             |       |          | D030M094      |          |                 |          |             |
| D032       | D032           |                             | D032P099                | D032M100   |          |          |             |       |          |               |          |                 |          |             |
| D033       | D033N          |                             | D033P101                | D033M102   | D033M104 |          |             |       |          |               |          |                 |          |             |
| D034       | D034N          |                             | D34P105                 |            |          |          |             |       |          |               |          |                 | D34M107  | D34M106     |
| D041       | D041N          |                             | D041P124                |            | D041M126 | D041M127 |             |       |          |               |          |                 |          | D041M128    |
|            |                |                             |                         |            |          |          |             |       |          |               |          |                 |          | D041M129    |
| D050       | D050N          | D050P153                    |                         |            | D050M154 | D050M156 |             |       |          |               |          |                 | D050M157 |             |
|            |                |                             |                         |            | D050M155 |          |             |       |          |               |          |                 |          |             |

|        |                           |
|--------|---------------------------|
| white  | no therapy                |
| green  | radio and chemotherapy    |
| grey   | other                     |
| yellow | targeted and chemotherapy |
| pink   | chemotherapy              |

**Supplementary Figure 1.** Specification and labeling of all 27 patients and their matched metastases included in the study. P: primary tumor, M: metastasis. Multiple primary samples are a results of histological differences found in the original single tumor which prompted us to isolated the sample. Multiple primary tumors represent multiple primary samples present during original surgery or following repeated surgical excision due to re-growth of original tumor. Exposure to therapy is marked by pink for chemotherapy, green for chemotherapy with radiotherapy, yellow for targeted therapy with chemotherapy and grey for other (unknown).

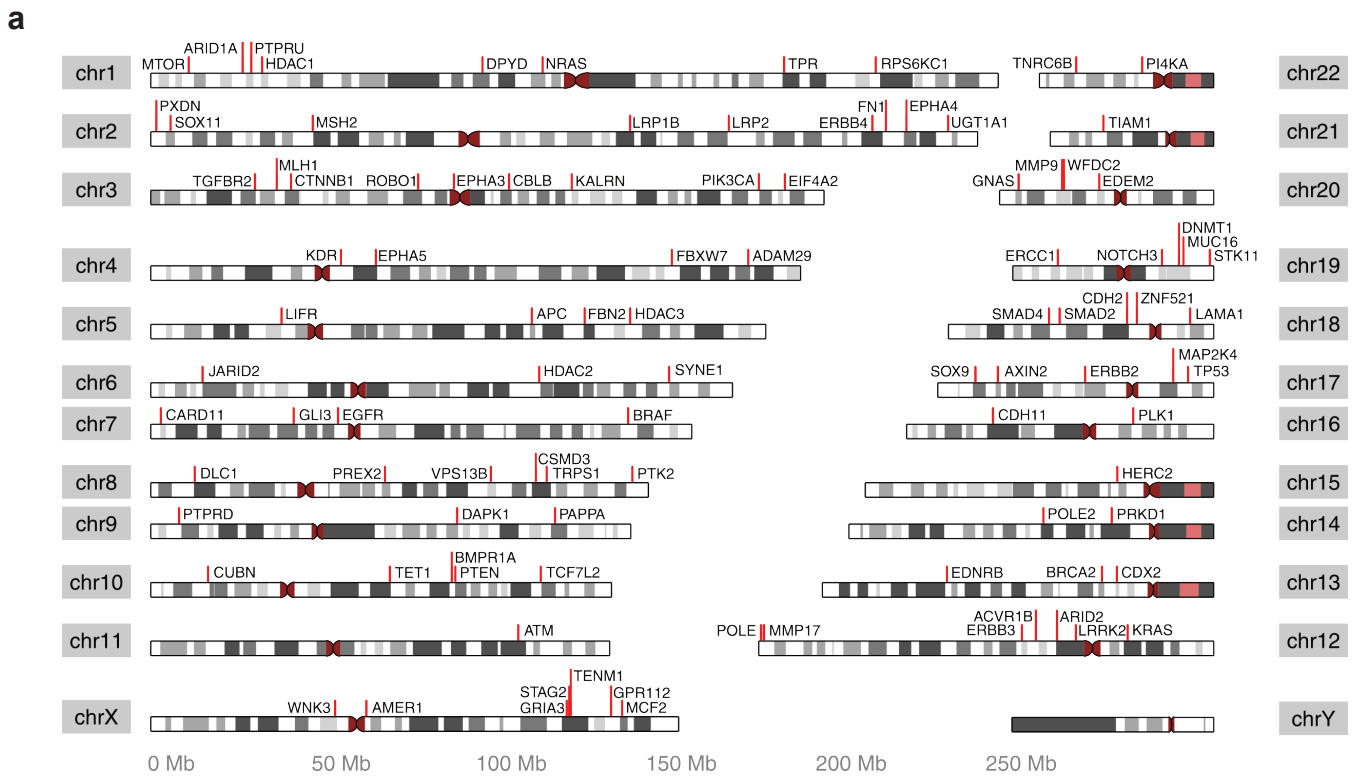

**b**

|        |         |             |        |
|--------|---------|-------------|--------|
| ACVR1B | EPHA3   | LIFR        | PXDN   |
| ADAM29 | EPHA4   | LRP1B       | ROBO1  |
| APC    | EPHA5   | LRP2        | SMAD2  |
| ARID1A | ERBB2   | LRRK2       | SMAD4  |
| ARID2  | ERBB3   | MAP2K4      | SOX11  |
| ATM    | ERBB4   | MCF2        | SOX9   |
| AXIN2  | ERCC1   | MLH1        | STK11  |
| BMPR1A | FAM123B | MMP17       | SYNE1  |
| BRAF   | FBN2    | MSH2        | TCF7L2 |
| CARD11 | FBXW7   | MTOR        | TET1   |
| CBLB   | FMN2    | MUC16       | TGFBR2 |
| CDH11  | FN1     | MUTYH       | TIAM1  |
| CDH2   | GLI3    | NOTCH3      | TNRC6B |
| CDX2   | GNAS    | NRAS        | TP53   |
| CEP110 | GPR112  | ODZ1        | TPR    |
| CSMD3  | GRIA3   | PAPP, PTPRU | TRPS1  |
| CTNNB1 | HDAC1   | PI4KA       | UGT1A1 |
| CUBN   | HDAC2   | PIK3CA      | VPS13B |
| DAPK1  | HDAC3   | PLK1        | WNK3   |
| DLC1   | HERC2   | POLE2       | ZNF521 |
| DNMT1  | JARID2  | PREX2       | BRCA2  |
| DPYD   | KALRN   | PRKD1       | PTK2   |
| EDNRB  | KDR     | PTEN        | MMP9   |
| EGFR   | KRAS    | PTPRD       | MMP24  |
| EIF4A2 | LAMA1   | PTPRU       | WFDC2  |

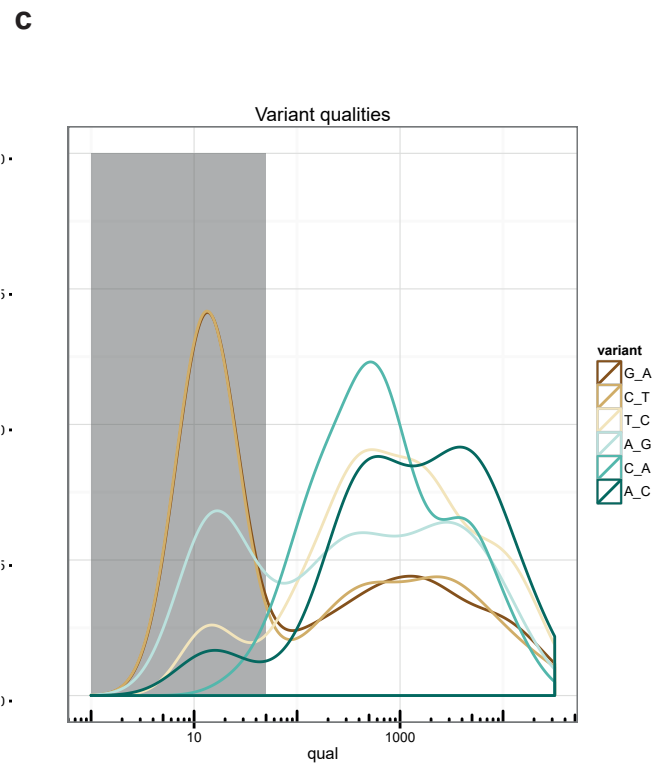

**Supplementary Figure 2.** CRC custom colorectal panel. (a) Overview and (b) list of genes targeted by the custom CRC panel. (c) Quality cut-off ( $q=50$ ) used during the analysis to ensure minimum false positive SNVs resulting from common C > T and T > C conversions in FFPE preparations.

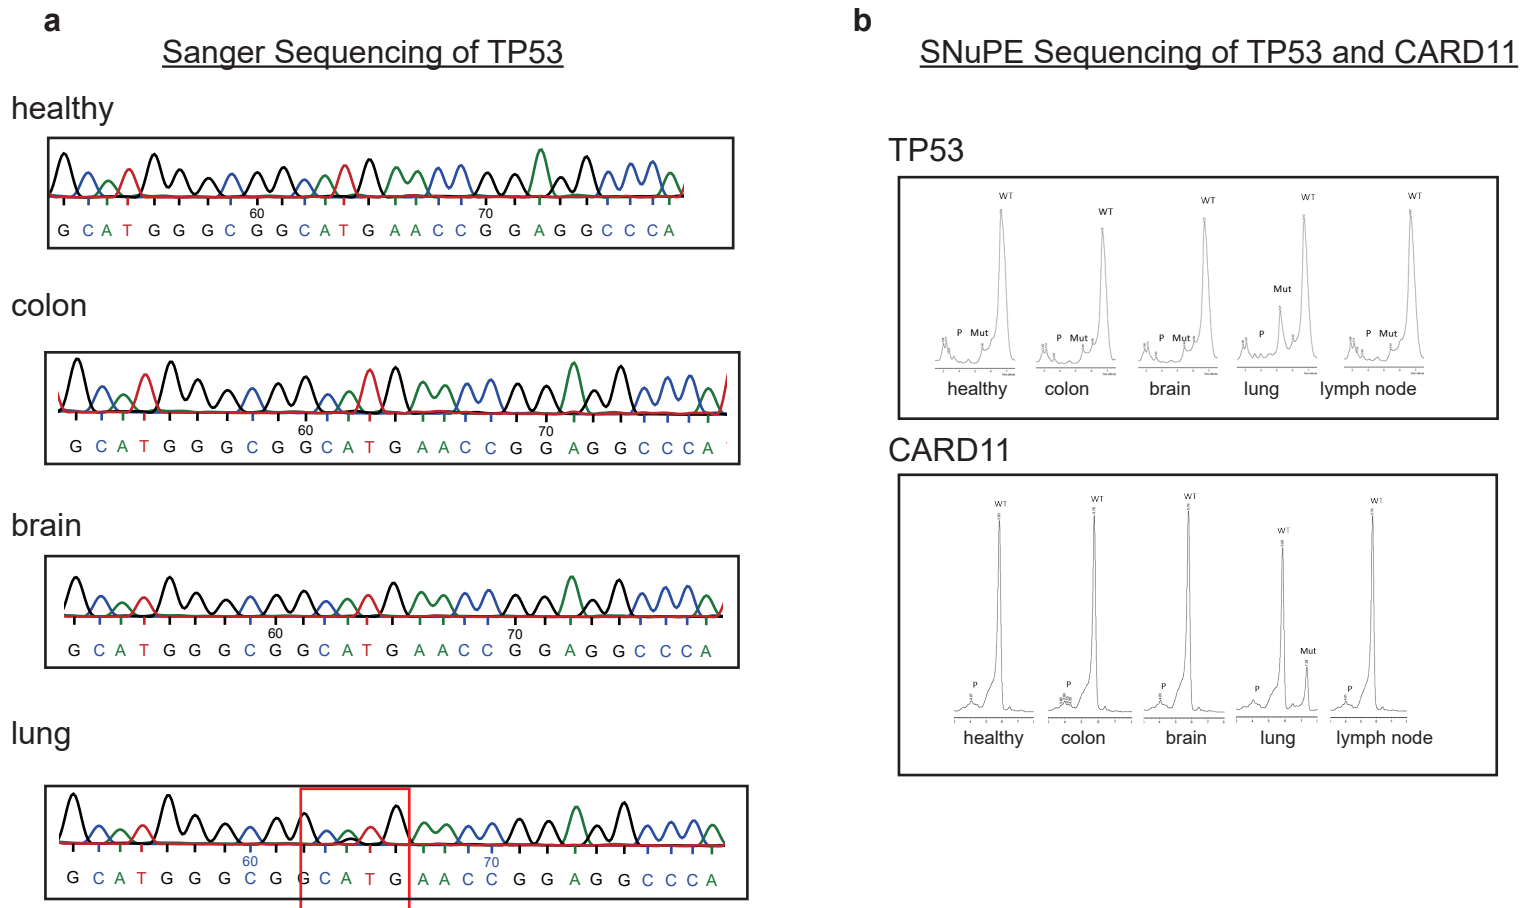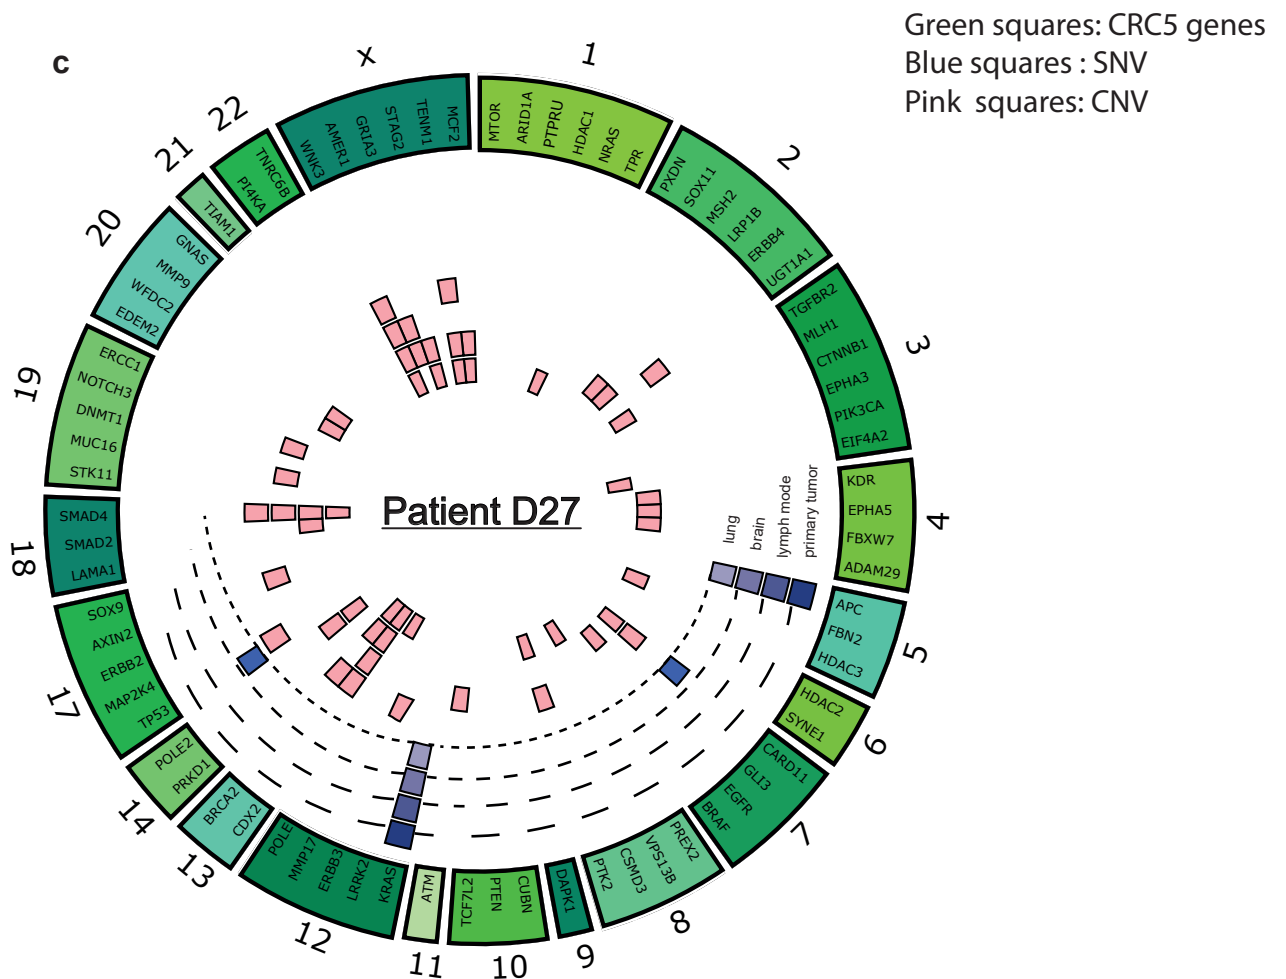

**Supplementary Figure 3.** Validation of SNVs in different samples from patient D27. **(a)** TP53 SNV validation by Sanger sequencing. All samples from this patient (healthy adjacent tissue, primary colon tumor, and brain and lung metastasis) were tested for the presence of the TP53 SNV. This mutation was only found in the lung sample. **(b)** SNuPE validation of TP53 and CARD11 SNVs for patient D27. **(c)** Circos diagram of patient D27 after validation. This patient displays a discordant mutation pattern private to the lung metastasis. Blue squares represent SNVs, pink squares represent CNVs (both losses and gains).

# Patients

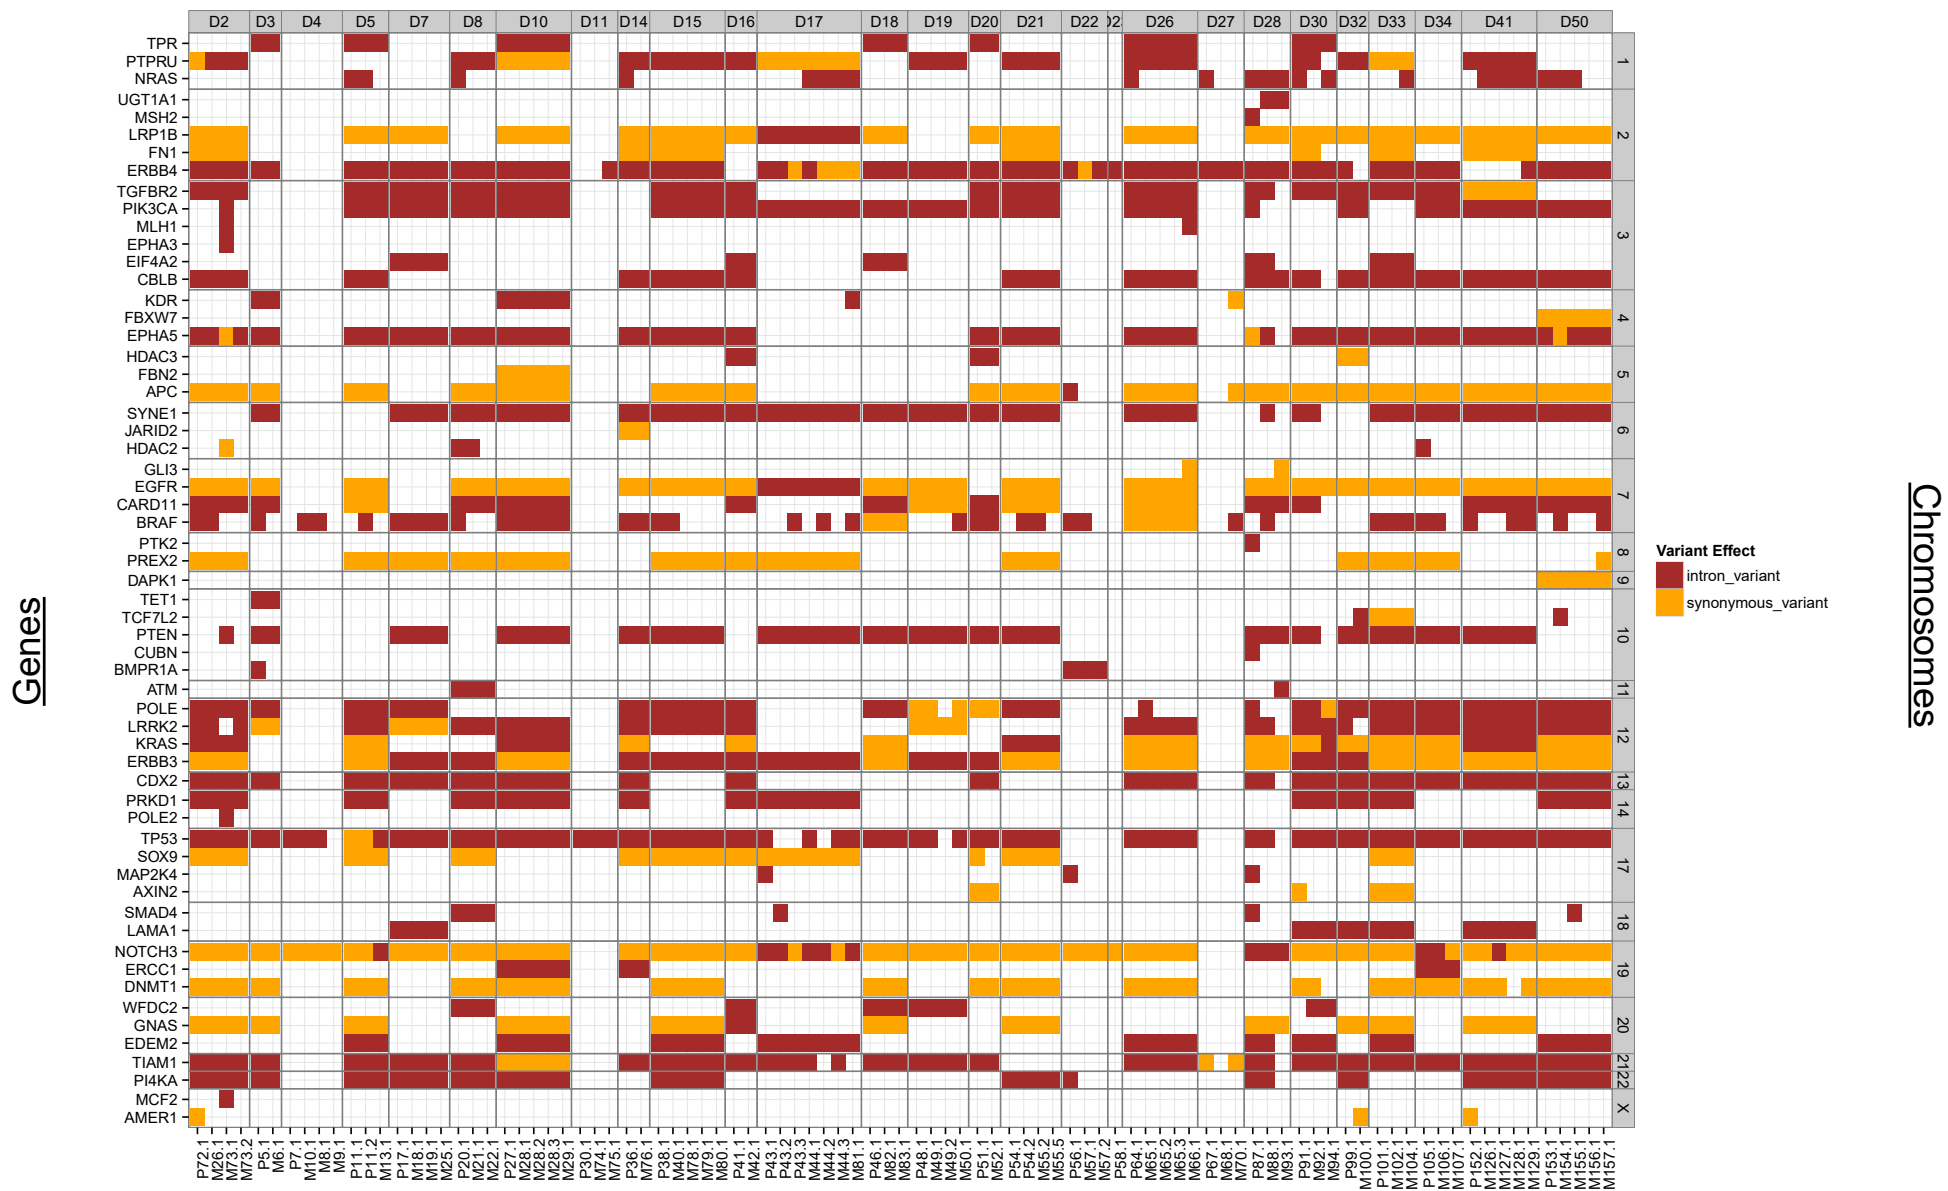

# Samples

**Supplementary Figure 4.** Intronic and synonymous SNV profiles in matched primary and metastatic tumors identified using the CRC panel.

## Patients

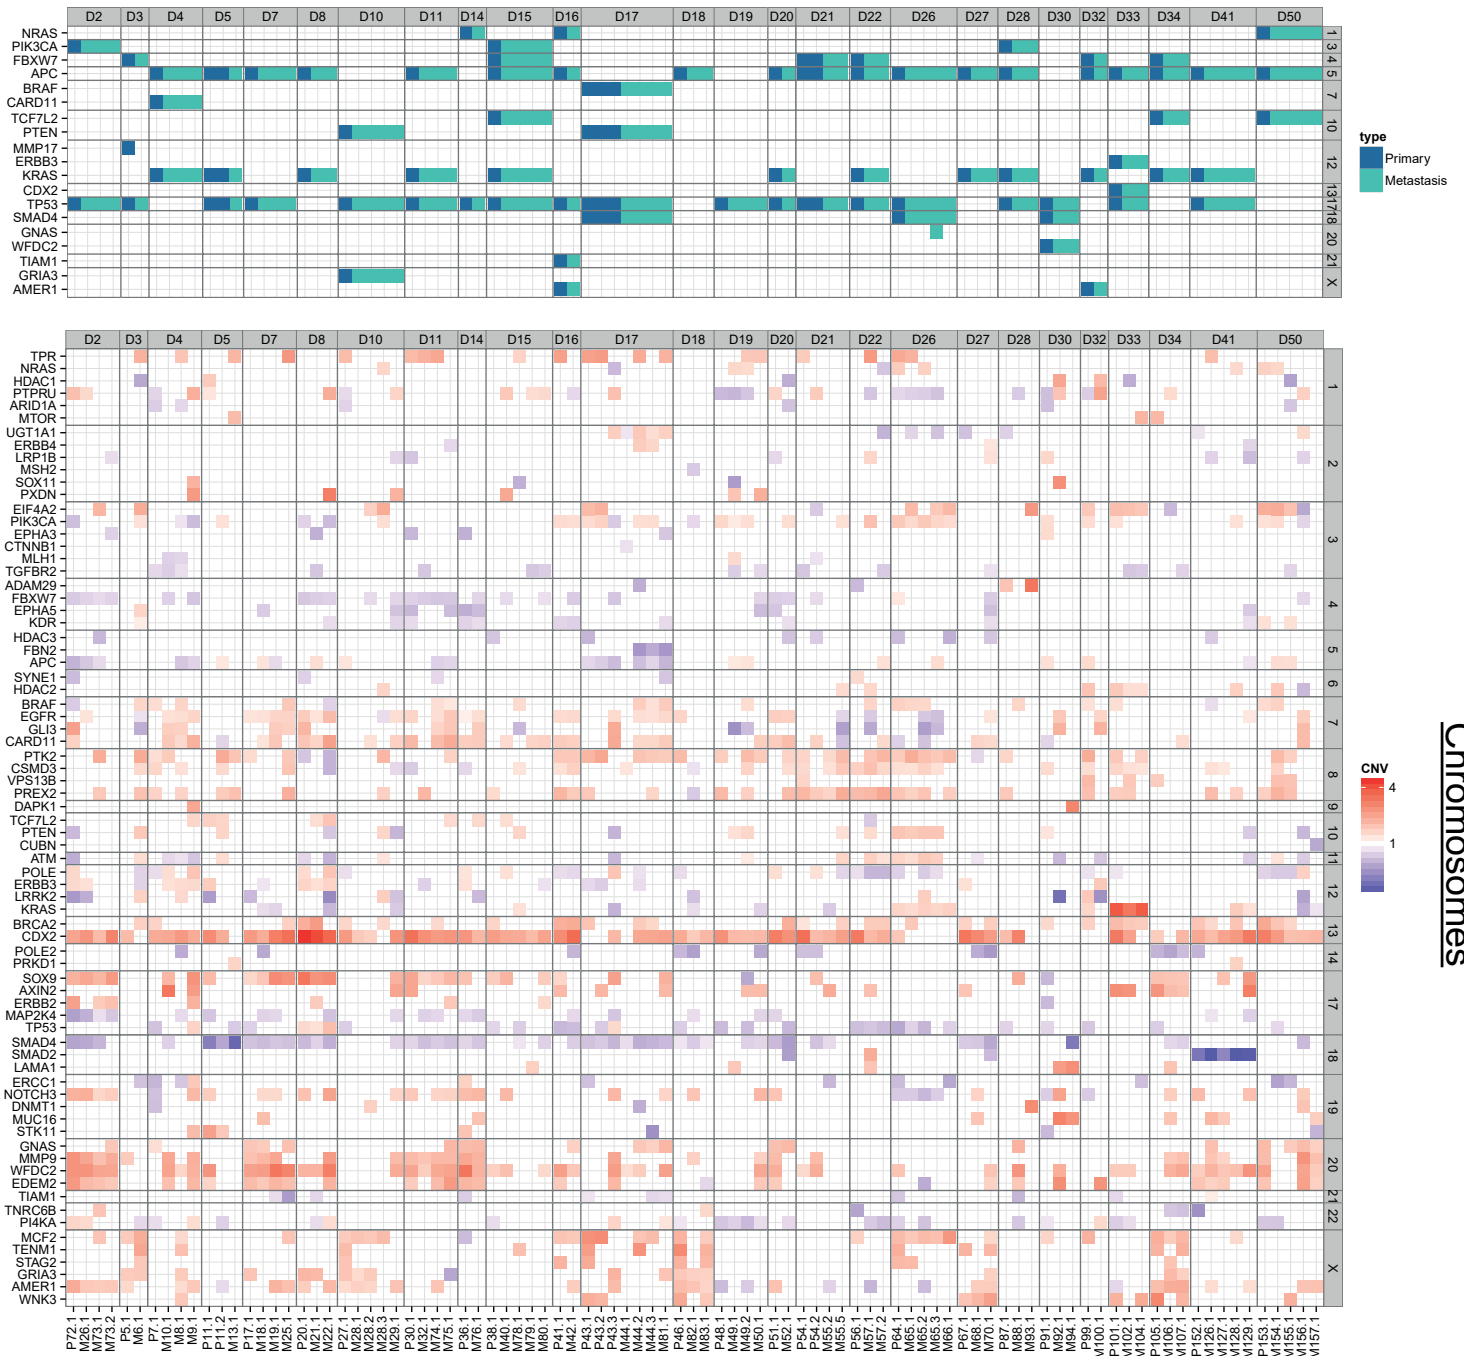

## Samples

**Supplementary Figure 5.** Complete representation of concordant SNVs but discordant CNV profiles in matched primary and metastatic tumors. In-depth representation of alterations at the SNV level (top) and the CNV level (bottom) for each patient's matched samples. Each SNV is indicated by blue (mutation in primary tumor sample) and turquoise (mutation in metastasis). CNVs are indicated in red for gain in copy number and in blue for loss. P is primary tumor and M is metastasis.

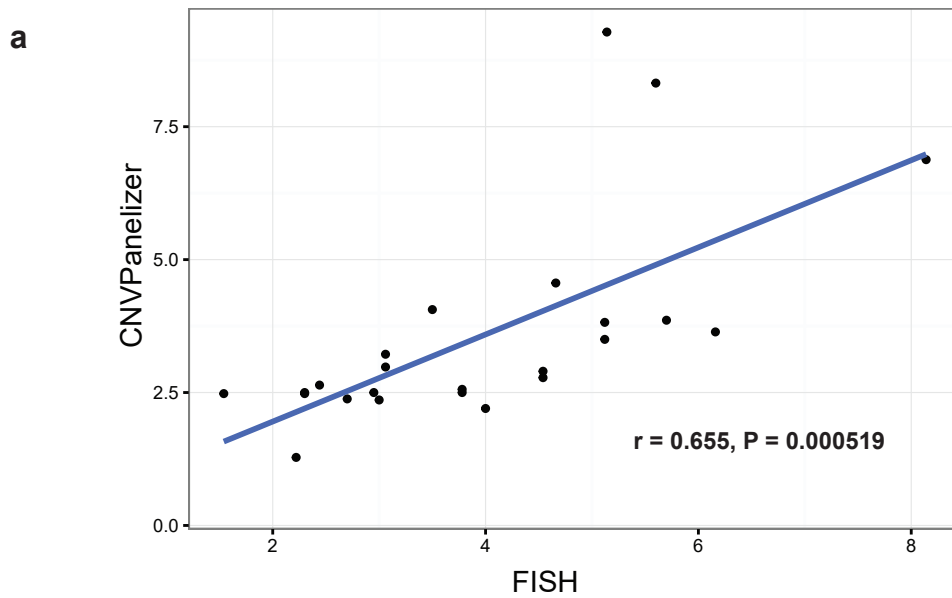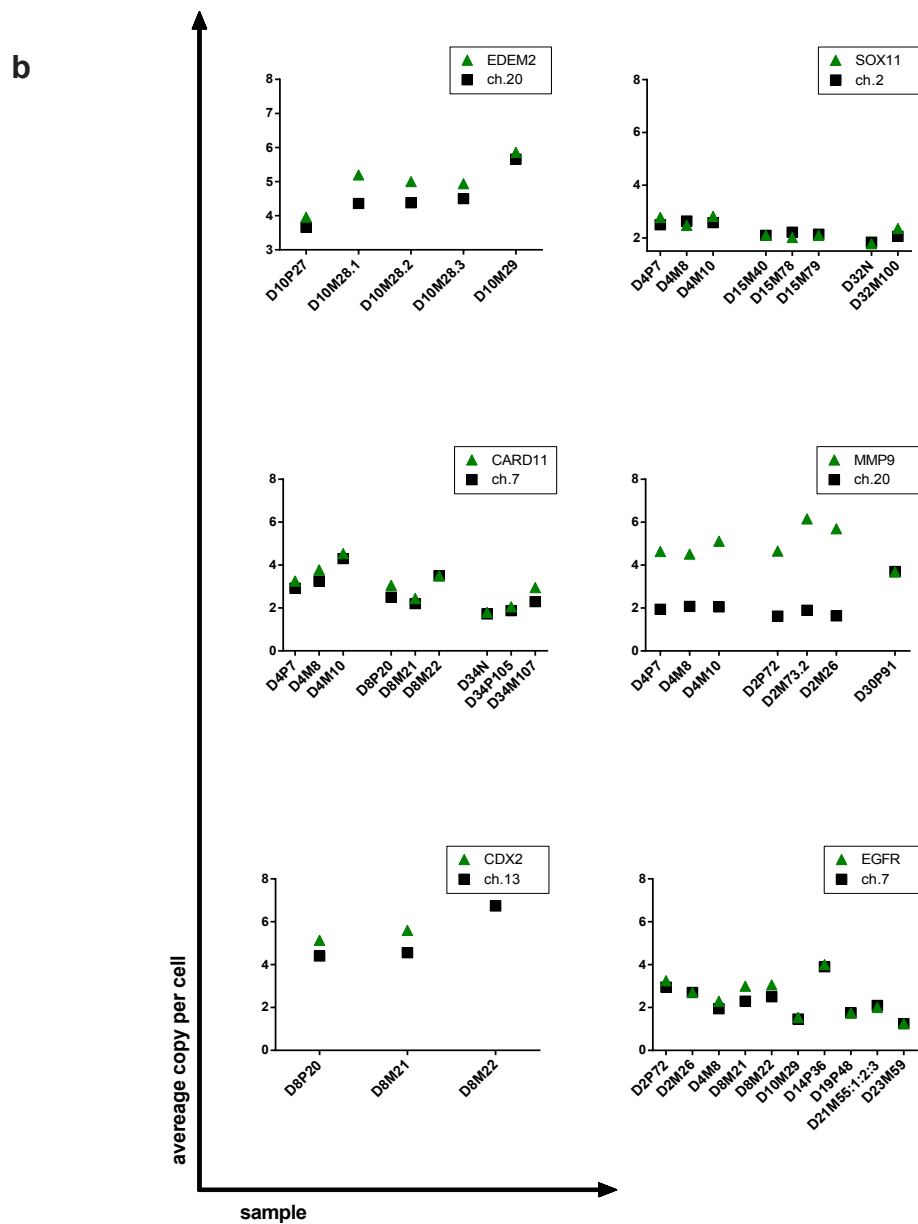

**Supplementary Figure 6. (a)** Comparison of CNV samples as determined by Fluorescence In-situ hybridization (FISH) (x-axis) or by CNVPanelizer from NGS data (y-axis). Resultant correlation coefficient  $r = 0.655$ ,  $p = 0.000519$ . (only samples with 'pass' (two significant thresholds passed) were used in this analysis (refer to Oliveira et al.)). **(b)** Gene copy number counts for *EDEM2*, *SOX11*, *CARD11*, *MMP9*, *CDX2* and *EGFR* as determined by FISH using gene-specific probes (green triangles) and corresponding chromosome-specific probes (black squares). 41 samples were analyzed, 50 cells were counted from one sample, average copy number per cell are depicted here.

## Blocks

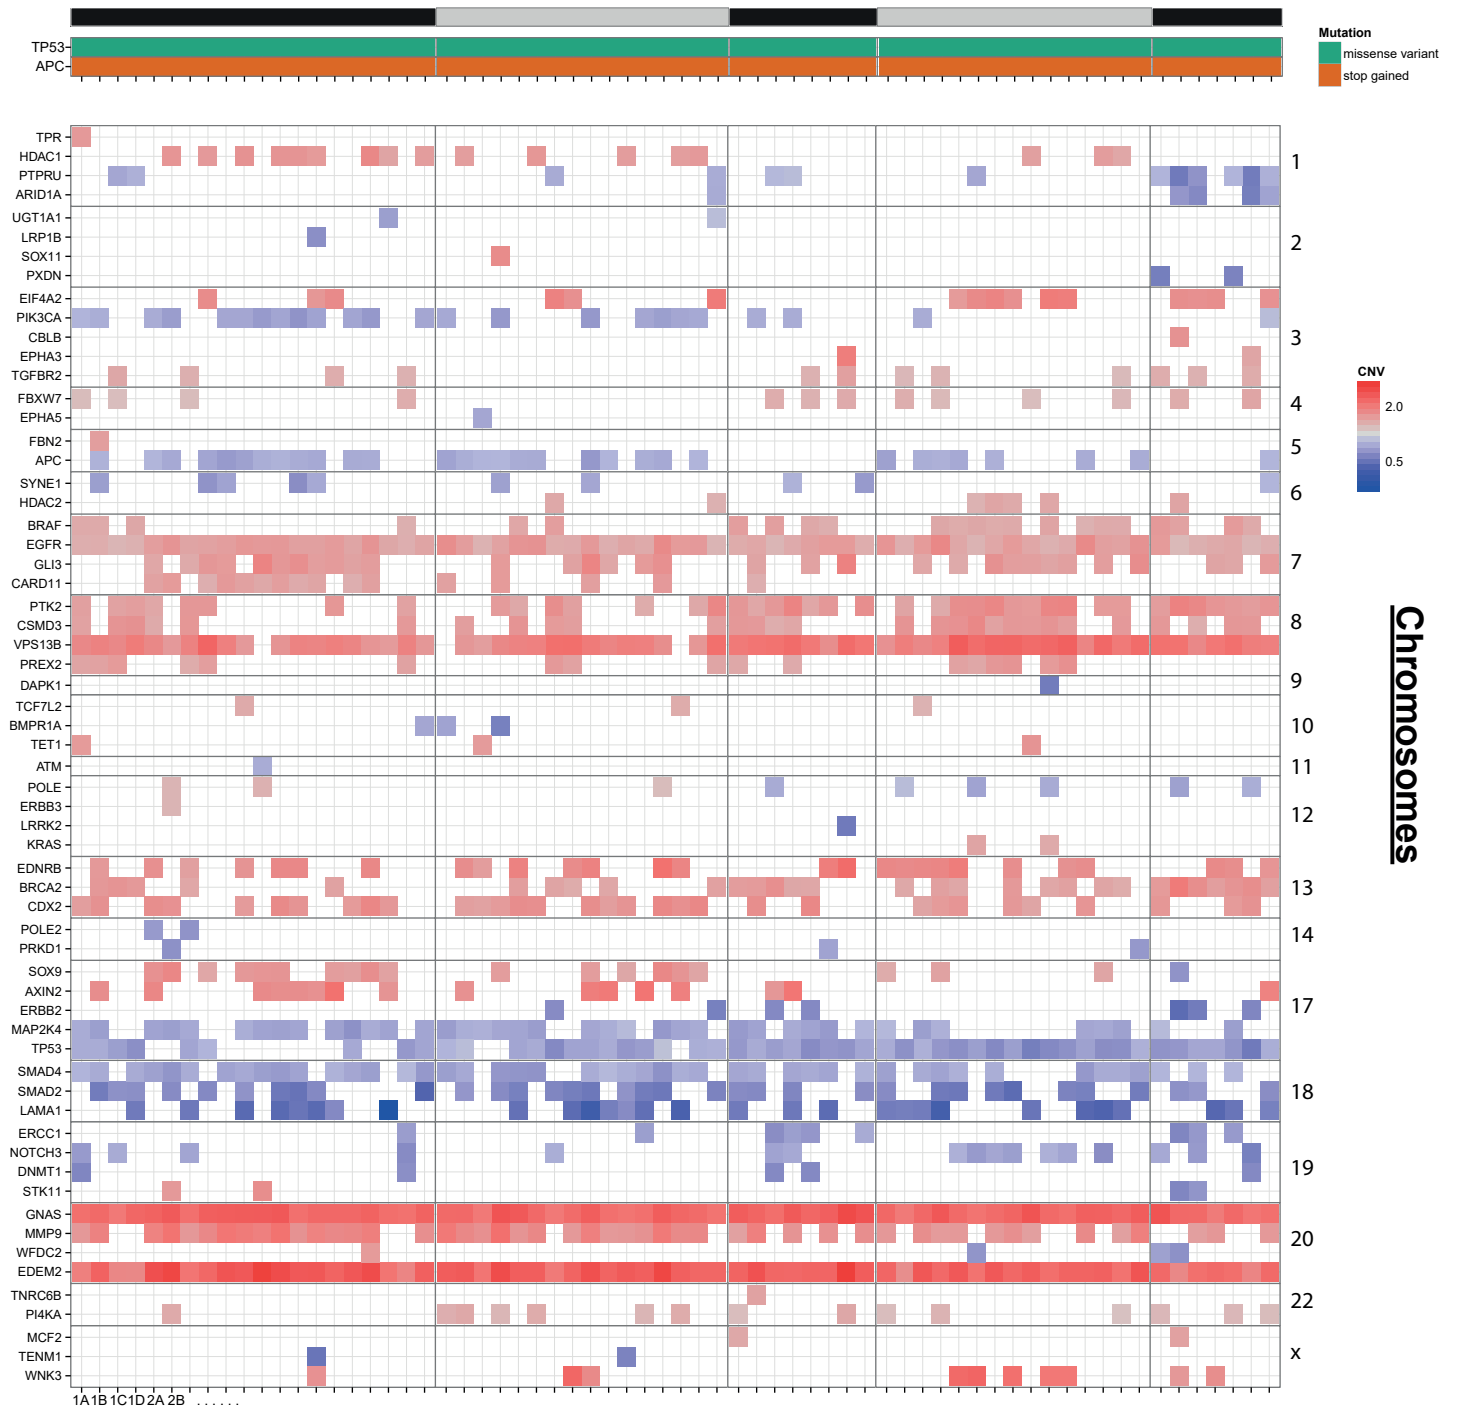

## Samples

**Supplementary Figure 7.** Complete representation of concordant intra-tumor SNV pattern but discordant intra-tumor CNV pattern. Top panel: genetic profile of 68 samples from one CRC tumor (using the CRC panel) displays a stop-gain APC (orange) and a missense TP53 (green) alteration throughout all samples from the tumor. Lower panel: heterogeneous CNV patterns throughout the same tumor are given in blue (copy loss) and red (copy gain).

## Blocks

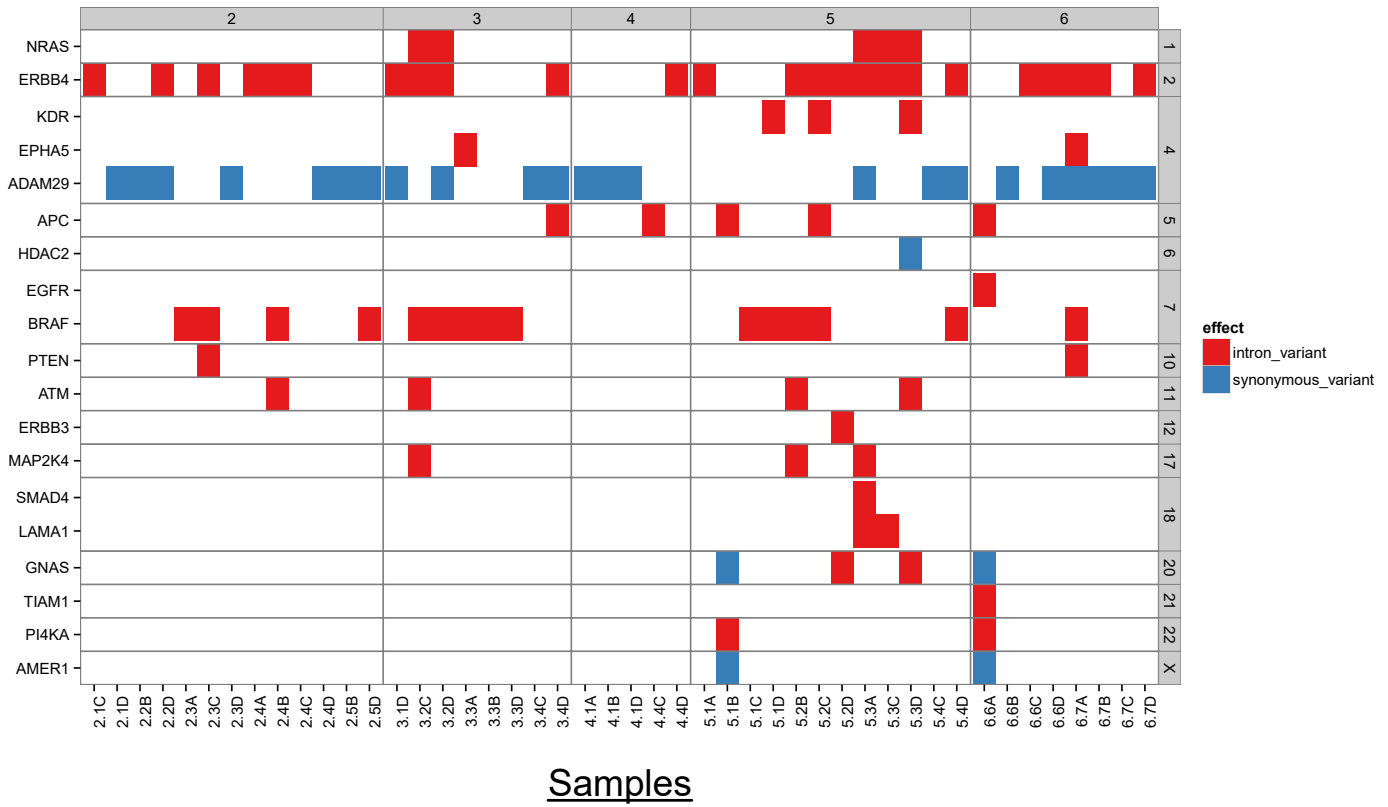

**Supplementary Figure 8.** Intronic and synonymous SNV profile in 68 samples from one CRC tumor identified using the CRC panel.



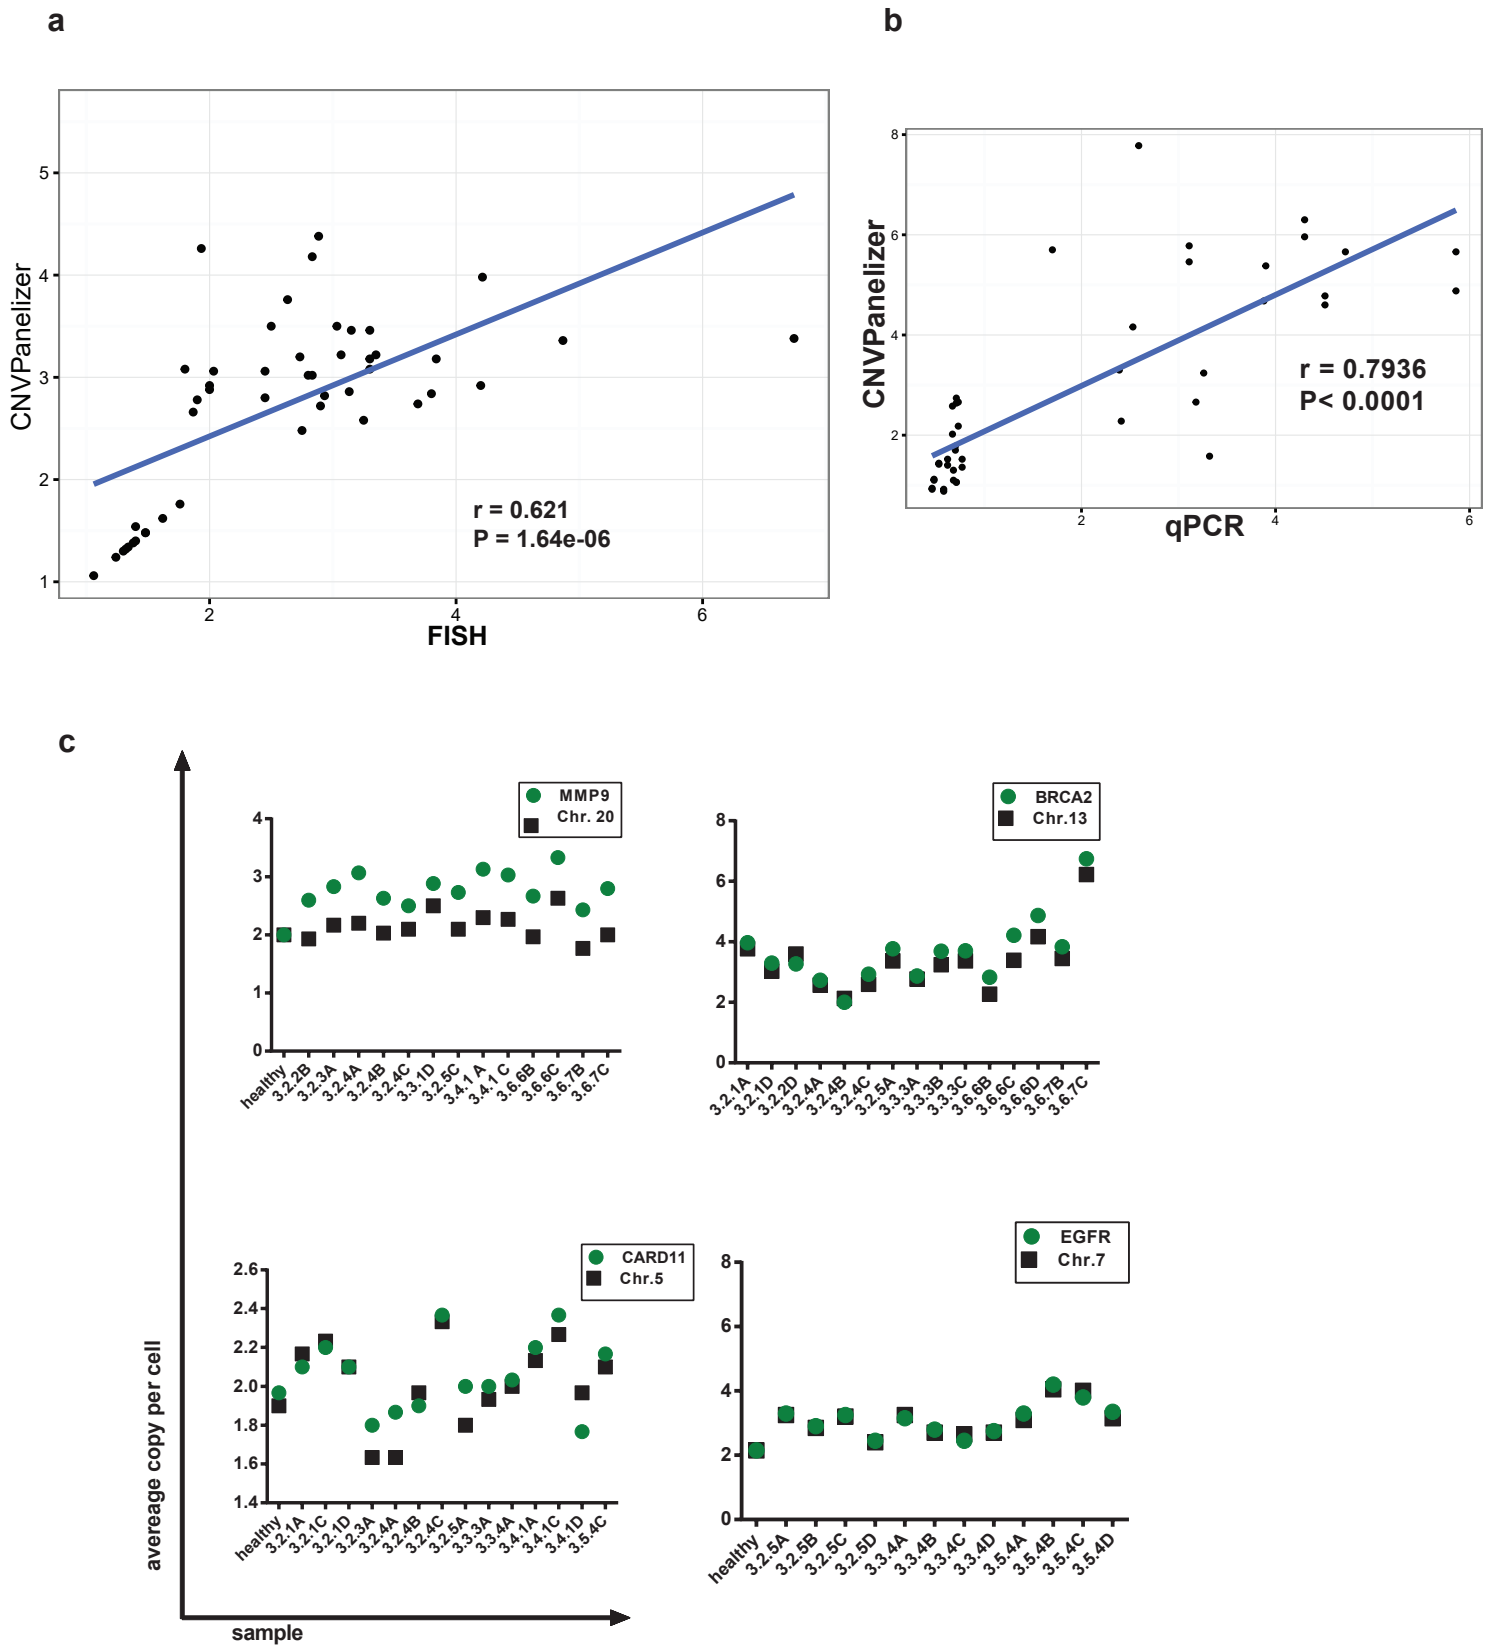

**Supplementary Figure 9. (a)** FISH analysis of *EGFR*, *TP53*, *BRCA2*, *MMP9* and *CARD11* in a subset of the 68 samples derived from the single tumor resultant correlation coefficient shows  $r = 0.621$  (only samples with 'pass' (two significant thresholds passed) were used in this analysis (refer to Oliveira et al.)) **(b)** qPCR validation of CNVs from *APC*, *EDEM2*, *GNAS*, *HDAC3*, *MAP2K4*, *MMP9*, *P53*, *SMAD4* and *SOX9* genes. The TERT gene served as a reference. Data was compared to CNVPanelizer output, resulting with correlation coefficient of  $r = 0.7936$ . **(c)** Gene copy number counts for *MMP9*, *BRCA2*, *CARD11* and *EGFR* as determined by FISH using gene-specific probes (green circles) and corresponding chromosome-specific probes (black squares). 73 samples were analyzed, 30 cells were counted from one sample, average copy number per cell is depicted here.

**a**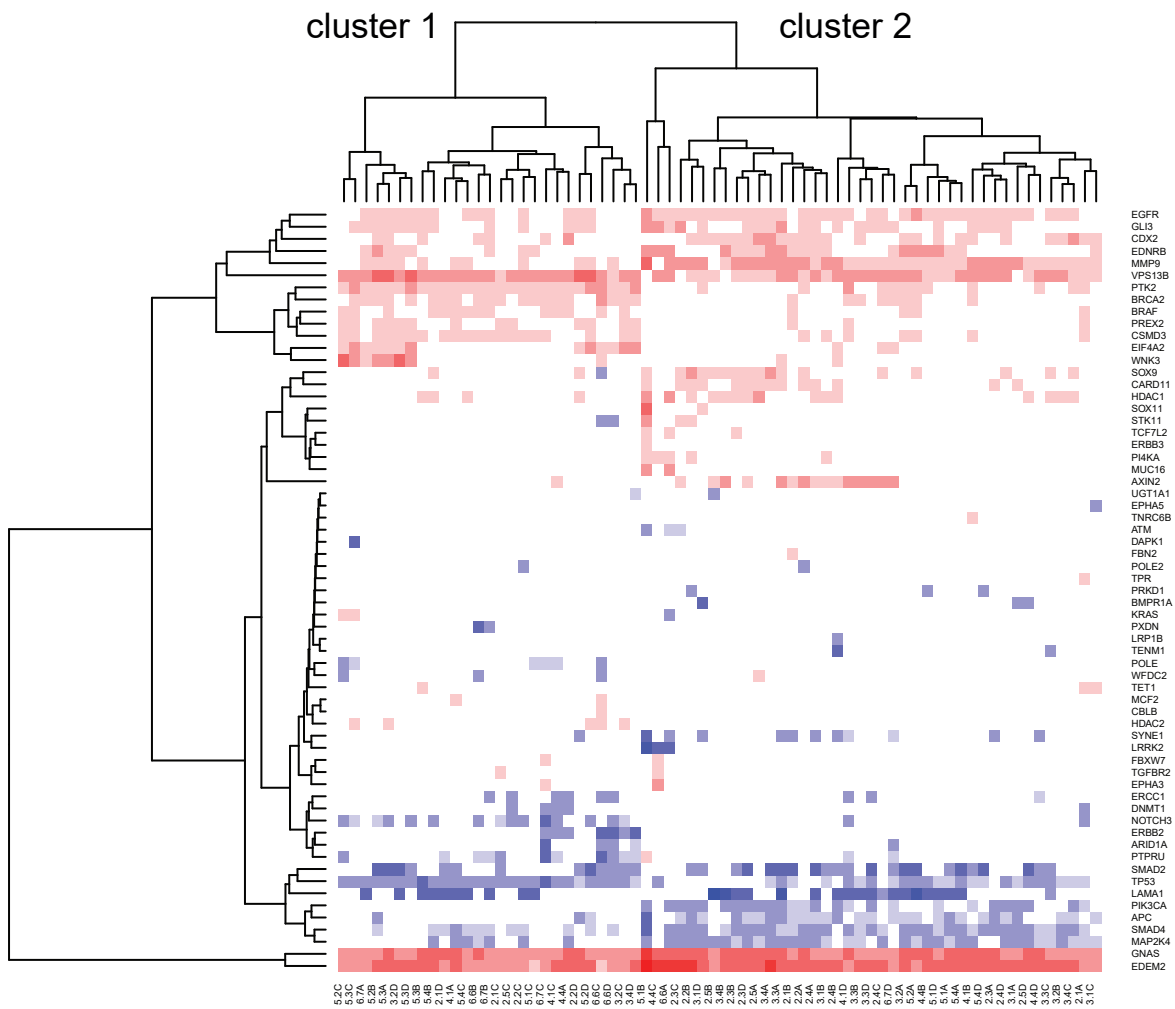**b**

### Cluster dendrogram with AU/BP values (%)

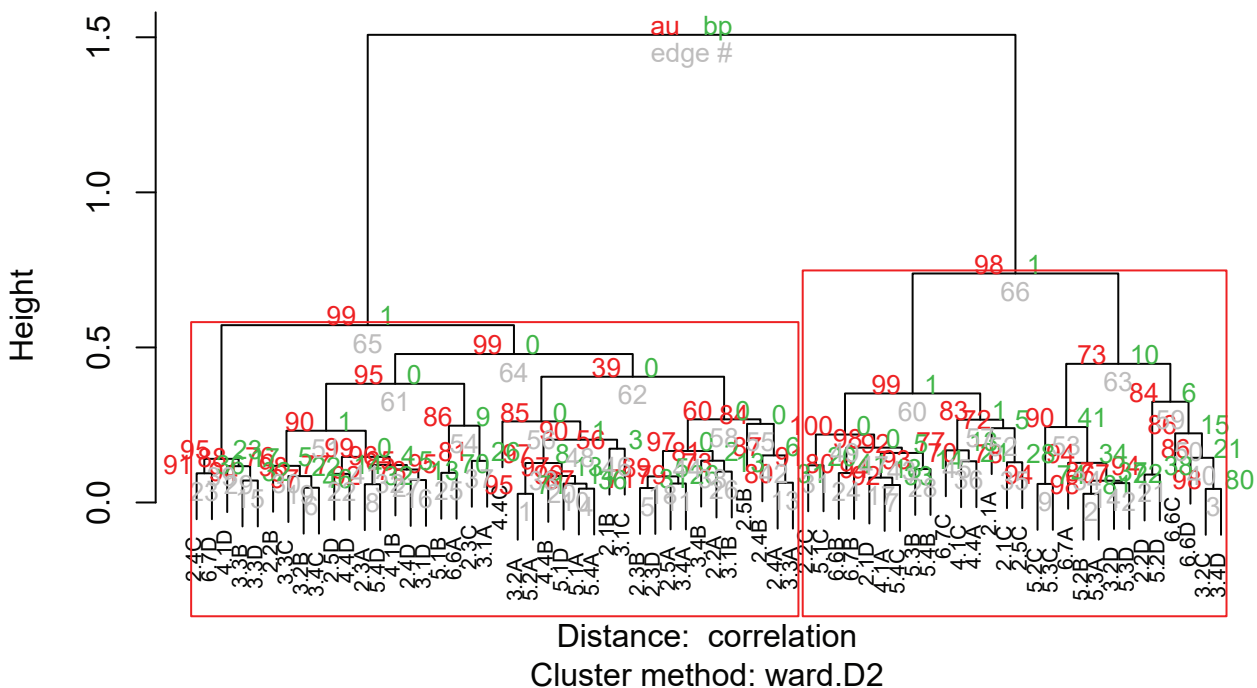

**Supplementary Figure 10: (a)** Clustering of CNVs derived by CNVPanelizer from the 68 samples within the tumor using agglomerative hierarchical clustering. The objective function used for clustering was the root sum of squared distances between sub-cluster points; the values of each point were the predicted copy number of each gene represented by the panel. Samples clustered into two distinct clusters; cluster 1 and cluster 2. **(b)** The stability of the clusters was assessed by bootstrapping tree construction with 10,000 repetitions and calculating the approximate unbiased p-value (AU). The two main clusters have an AU of 99 indicating that they are highly reliable.

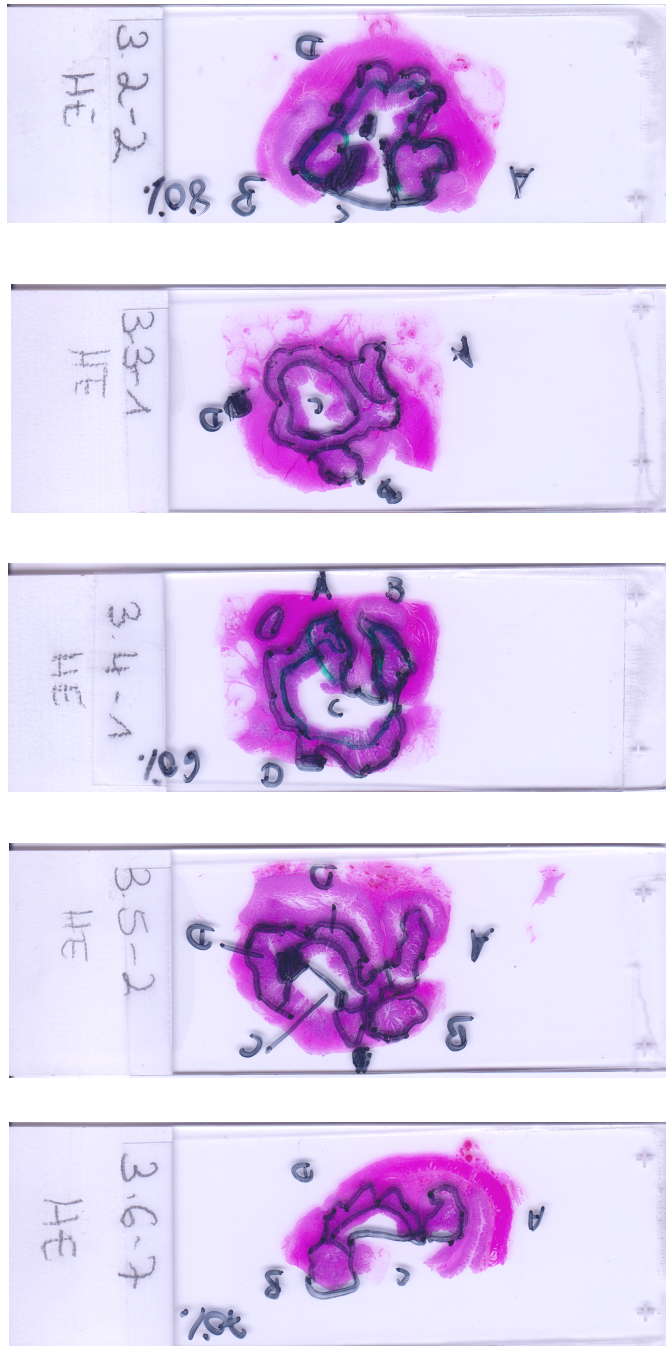

**Supplementary Figure 11.** Representative macro images of tissue H&E sections used for the 3D reconstruction model. Areas designated A, B, C and D correspond to the left and right lateral tumor regions, and the luminal and deep invasive front, respectively.

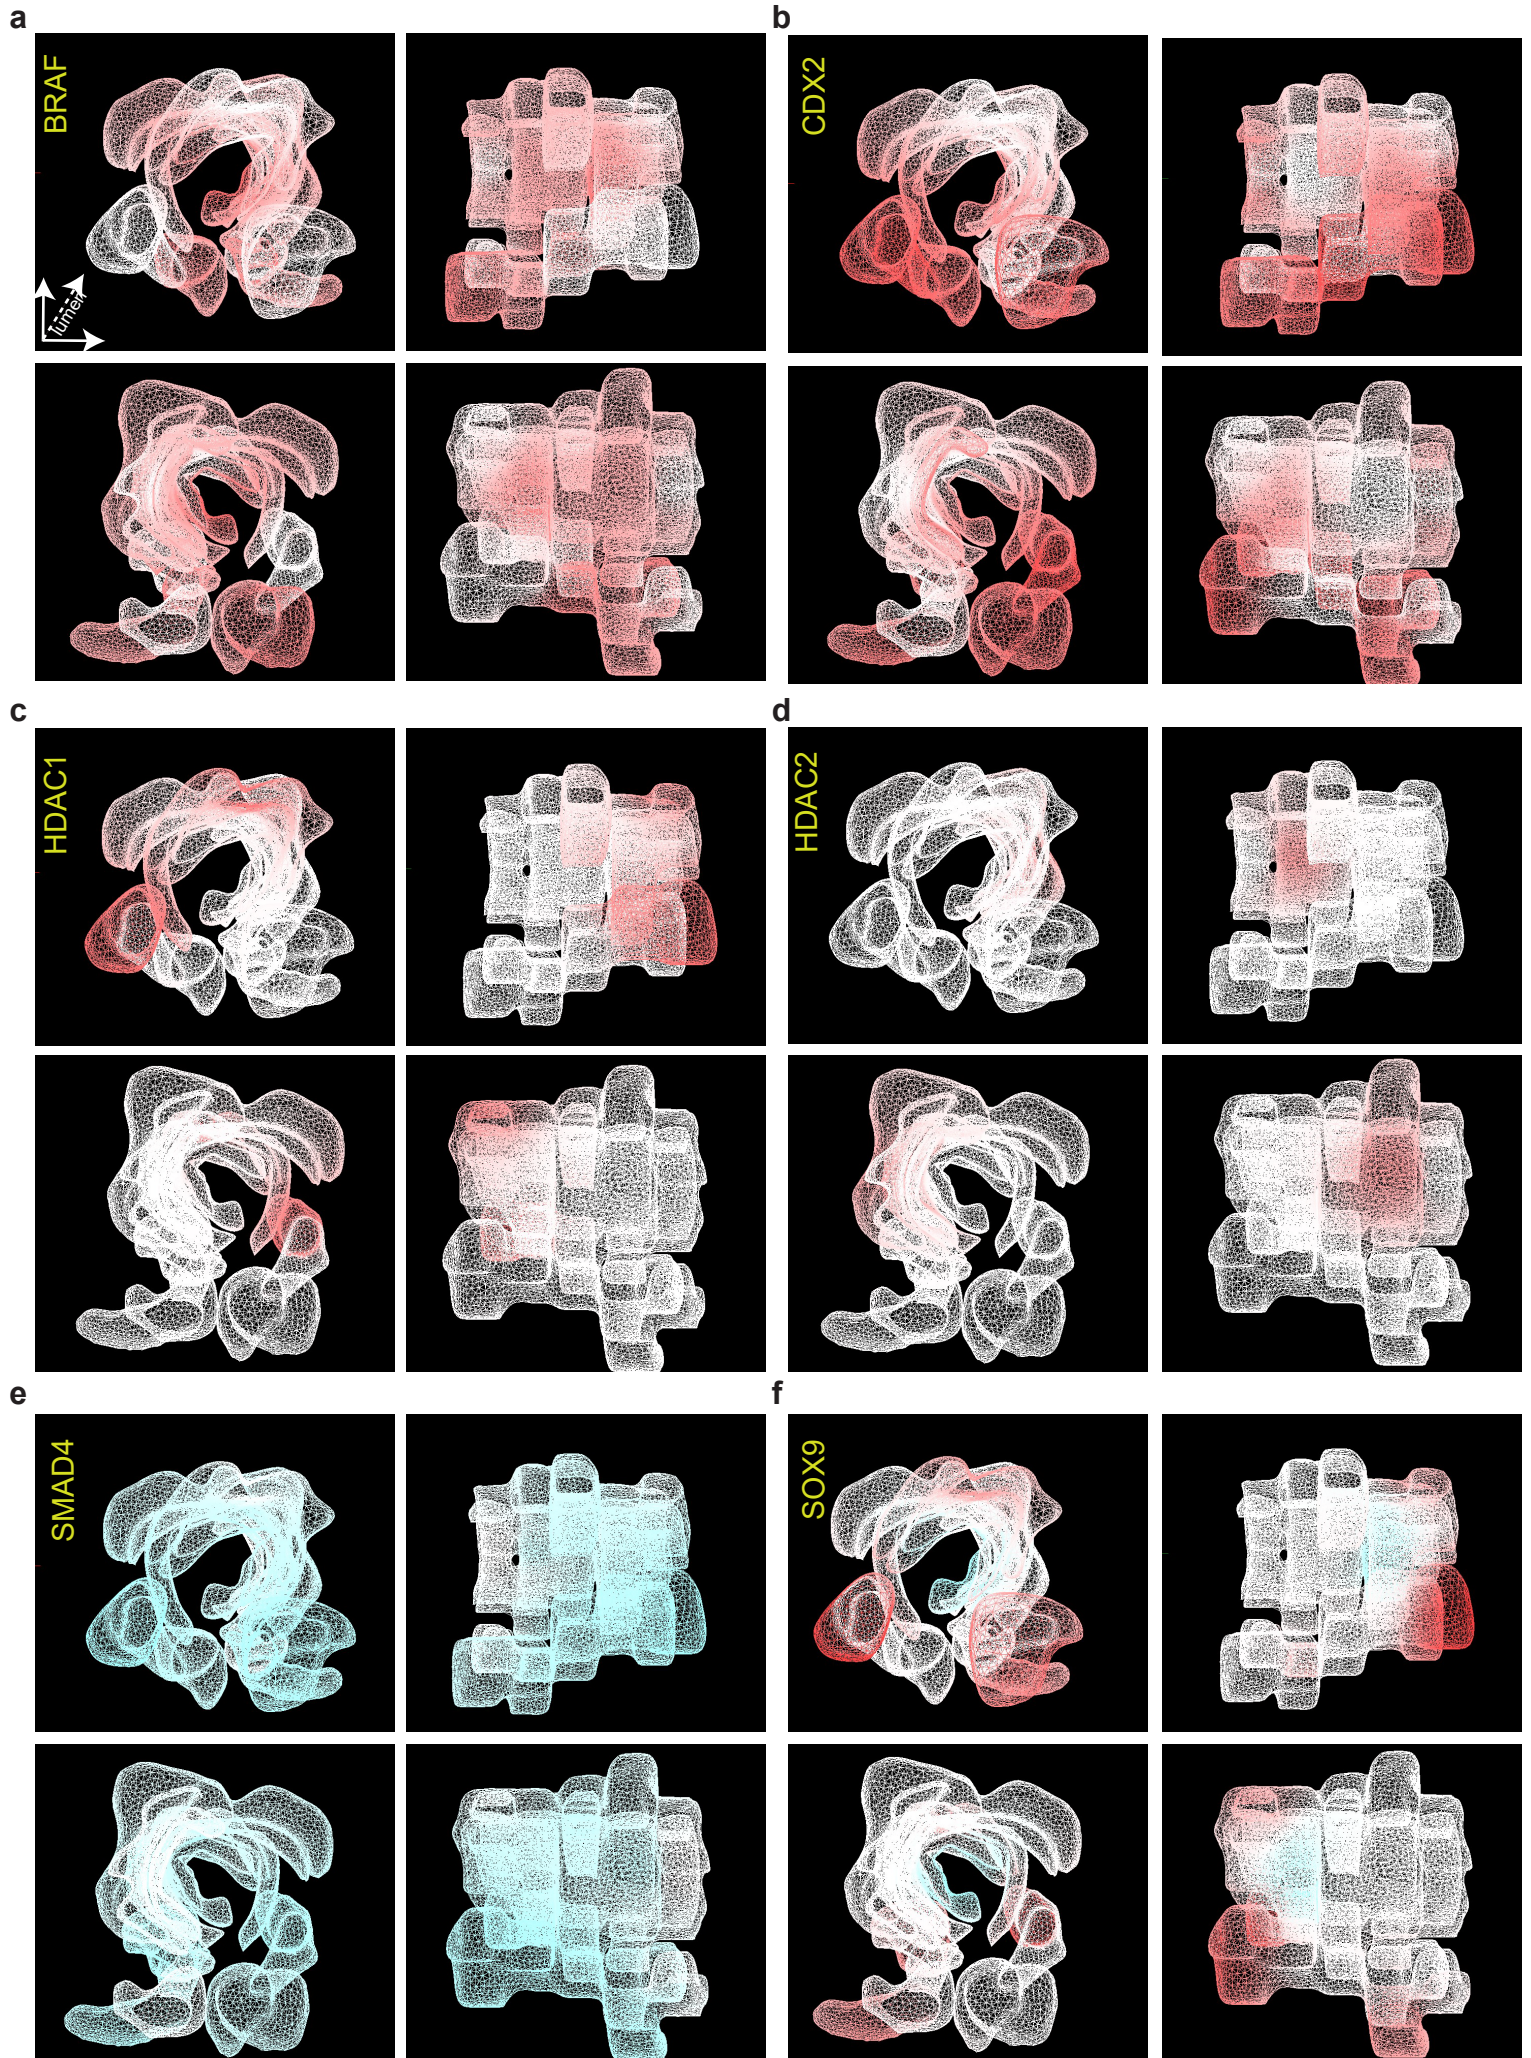

**Supplementary Figure 12.** 3D morphological tumor models generated from slides stained with H&E, overlaid with distribution of CNVs from the 68 samples investigated representing (b) *BRAF*, (c) *CDX2*, (b) *HDAC1*, (d) *HDAC2*, (e) *SMAD4* and (f) *SOX9*.

**Supplementary Table 1.** Samples found in cluster 1 and cluster 2.

| sample | cluster |
|--------|---------|
| 3.3.2C | 1       |
| 3.2.1D | 1       |
| 3.3.4D | 1       |
| 3.2.1C | 1       |
| 3.5.3C | 1       |
| 3.2.5C | 1       |
| 3.5.3D | 1       |
| 3.5.2C | 1       |
| 3.5.1C | 1       |
| 3.4.1C | 1       |
| 3.6.7C | 1       |
| 3.6.6D | 1       |
| 3.6.6C | 1       |
| 3.6.7B | 1       |
| 3.6.6B | 1       |
| 3.4.1A | 1       |
| 3.5.4C | 1       |
| 3.2.2C | 1       |
| 3.5.3A | 1       |
| 3.5.2D | 1       |
| 3.3.2D | 1       |
| 3.6.7A | 1       |
| 3.5.2B | 1       |
| 3.2.1A | 1       |
| 3.4.4A | 1       |
| 3.5.4B | 2       |
| 3.4.1D | 1       |
| 3.5.3B | 1       |
| 3.6.7D | 2       |
| 3.5.2A | 1       |
| 3.2.2D | 2       |
| 3.4.4D | 2       |
| 3.3.2A | 2       |
| 3.4.4C | 1       |
| 3.2.4C | 2       |
| 3.4.4B | 2       |
| 3.2.5B | 2       |
| 3.4.1B | 2       |
| 3.3.1C | 2       |
| 3.5.1B | 2       |
| 3.3.3D | 2       |
| 3.2.1B | 2       |
| 3.3.3B | 2       |

| sample | cluster |
|--------|---------|
| 3.6.6A | 2       |
| 3.2.4B | 2       |
| 3.5.4D | 2       |
| 3.3.3C | 2       |
| 3.2.5D | 2       |
| 3.5.1A | 2       |
| 3.3.3A | 2       |
| 3.5.4A | 2       |
| 3.3.1A | 2       |
| 3.3.4C | 2       |
| 3.3.1D | 2       |
| 3.2.3C | 2       |
| 3.3.2B | 2       |
| 3.3.4B | 2       |
| 3.2.3A | 2       |
| 3.3.4A | 2       |
| 3.2.2B | 2       |
| 3.3.1B | 2       |
| 3.2.2A | 2       |
| 3.2.4A | 2       |
| 3.2.5A | 2       |
| 3.5.1D | 2       |
| 3.2.4D | 2       |
| 3.2.3D | 2       |
| 3.2.3B | 2       |
|        |         |
|        |         |

**Supplementary Table 2.** p values of CNV differences between the clusters. Key genes are shown.

| <b>Gene</b> | <b>P value</b> |
|-------------|----------------|
| CSMD3       | 7.49E-08       |
| PTK2        | 3.33E-06       |
| BRCA2       | 1.86E-05       |
| NOTCH3      | 1.94E-05       |
| MMP9        | 6.81E-05       |
| PREX2       | 1.38E-04       |
| BRAF        | 2.32E-04       |
| CARD11      | 2.54E-04       |
| HDAC1       | 6.01E-03       |

**Supplementary Table 3.** Primers used for Sanger sequencing.

Inter-tumor heterogeneity

| Gene   | Position       | Forward primer sequence        | Reverse primer sequence           |
|--------|----------------|--------------------------------|-----------------------------------|
| APC    | 5:112174724    | CGAGTGGGTCTAATCATGGA           | AGGCTGATCCACATGACGTT              |
| SMAD4  | 18: 48,591,825 | AGCTCCTGAGTATTGGTGTTC          | TCAATGGCTTCTGTCTGTG               |
| PIK3CA | 3: 178,937,373 | TGTATTGCTTGGTAAAAGATTGG        | GCTGAATTAATACTGAGAAAGTTG          |
| FBXW7  | 4: 153244227   | CCCACTCTCCAATGTGACTAGGT        | TGGTTTTGTCTAGGTCCCAACAA           |
| CARD11 | 7:2984030      | TGAACGAGGTCATCAAGCTG           | CCTCACTGAGCTGTGCGTAG              |
| PIK3CA | 3: 178947179   | CCTTATGGTTGTCTGTCAATCGGT       | TACAACCTCACATTTCTCCTTTGTTCTTGT    |
| NOTCH3 | 19: 15285135   | AGTACTGCGCCGACCACTT            | GAACGCAGTAGCTCCTCTGG              |
| ARID1A | 1:27058024     | CTCCCAGCAGTCGACGACAC           | TAGGCAGTTTGCTGGGACTG              |
| FBXW7  | 4:153245446    | AAAGGTGAGTAAGACTTACCTTGCA      | ATGTGGAGACAGGGAATTGCAT            |
| FBXW7  | 4:153247367    | ACACCTTTACCATAAAATCATATGCTCCA  | GTTTCTCCCTCTGCAGAGTTGT            |
| TCF7L2 | 10: 114901021  | CGGTGTCTTTCTCTGTTCTCCT         | CCCACAGCCTACCTGTTTTGG             |
| SMAD4  | 18:48591919    | CTGAGTATTGGTGTCCATTGCTTAC      | CTCTCAATGGCTTCTGTCTGT             |
| TP53   | 17:7577545     | GGCTCCTGACCTGGAGTCTT           | CTCATCTTGGGCCTGTGTTATCTC          |
| AMER1  | x:63412095     | CCTCGTCATCATCATCTGGCAA         | TTCATTGACAGGTTGTGGTGACA           |
| DLC1   | 8:13356821     | CAGTCTCTGTTTGTGCAAGGA          | TGCAGTGGATACTTTGAACGTGAA          |
| ERBB3  | 12:56481620    | CCCTAACAGCCATGCTTTCTCT         | GGAAAGGTTACATACAAAGCAGTCT         |
| CDX2   | 13:28537449    | CTCTGGGACACTTCTCAGAGGA         | TCCACCTTTCCATTCTAGGTTAAAATCTG     |
| TIAM1  | 21:32624093    | CTCCCCTCTCACCTTTCTCAG          | CAGTCGGACATCCTGCTGAC              |
| AMER1  | x: 63411365    | GCATAGGCTTCCCTGCCATAAG         | CTAGTGACCATCCAGAAACAGTTGT         |
| SMAD4  | 18:48604750    | TGTTGATGACCTTCGTCGCTTA         | TCTGCAATCGGCATGGTATGAA            |
| DNMT1  | 19:10267076    | CCCAAACATAATCCCGGACTATTCC      | TAAGCATGTGCTTTGTTTCTGTCTA         |
| TIAM1  | 21: 32624166   | CTCCCCTCTCACCTTTCTCAG          | CAGTCGGACATCCTGCTGAC              |
| SMAD4  | 18:48604787    | TGTTGATGACCTTCGTCGCTTA         | TCTGCAATCGGCATGGTATGAA            |
| ERBB4  | 2:212652762    | TAAGCATAACTCATTATCGCCACAT      | GCAGACACCATTATTGGCAAG             |
| APC    | 5:112173887    | CATCAAGAGGAAGCTTAGATAGTTCTCG   | CTTCTCCATGACTTTGGCAATCTG          |
| PTEN   | 10:89711910    | CCAGGGAGTAAGTATCCAGTCA         | AGAATTTCAAGCACTACTGCAAGTTC        |
| DNMT1  | 19:10267076    | CCCAAACATAATCCCGGACTATTCC      | TAAGCATGTGCTTTGTTTCTGTCTA         |
| TIAM1  | 21:32624166    | CTCCCCTCTCACCTTTCTCAG          | CAGTCGGACATCCTGCTGAC              |
| ARID1A | 1:27105929     | AGTAAGTTTGACAAGCTTCCAGTAAAGA   | GCTCTGTCTTGTCTCGAAGT              |
| AXIN2  | 17:63532566    | TCGACACCTCAGTAGCCT             | TCGTCTCCAGGCGAACGAG               |
| PIK3CA | 3:178952076    | GGCTCTGGAATGCCAGAACTAC         | GTTAATTGTGTGGAAGATCCAATCCATT      |
| APC    | 5:112174572    | CTGAGAGCACTGATGATAAACACCT      | TCTTCATAGTCATCTTCTTGACACAAAGAC    |
| ATM    | 11:108186638   | TTCCTTCTCAATTTTGTGTTTCCATGT    | TCCTTCATAAACAGAATTACTATACCGTTGTTT |
| PIK3CA | 3:178936082    | ATTTTACAGAGTAACAGACTAGTAGAGACA | CTCCATTTTAGCACTACCTGTGACT         |
| SMAD4  | 18:48591918    | CTGAGTATTGGTGTCCATTGCTTAC      | CTCTCAATGGCTTCTGTCTGT             |

|        |             |                                 |                             |
|--------|-------------|---------------------------------|-----------------------------|
| PIK3CA | 3:178936091 | ATTTTACAGAGTAACAGACTAGCTAGAGACA | CTCCATTTTAGCACTTACCTGTGACT  |
| KRAS   | 12:25378647 | GCCTGTTTTGTGTCTACTGTTCTAGA      | GACAAAAGTTGTGGACAGGTTTTGA   |
| PTEN   | 10:89692892 | TGAGGTTATCTTTTTACCACAGTTGCA     | ATATCATTACACCAGTTCGTCCTTTC  |
| FBXW7  | 4:153258954 | TGACAATGTTTAAAGGTGGTAGCTGT      | TCATTGATAGTTGTGAACCAACAAGT  |
| APC    | 5:112175473 | GACACCCAAAAGTCCACCTGAA          | GCTTATAATGCCACTTACCATTCCACT |
| TP53   | 17:7577142  | CTTGCTTACCTCGCTTAGTGCT          | CTTGCTTCTCTTTTCTATCCTGAGT   |
| ARID1A | 1:27057934  | CTCCCAGCAGTCGACGACAC            | TAGGCAGTTTGCTGGGACTG        |
| SMAD4  | 18:48604787 | TGTTGATGACCTTCGTCGCTTA          | TCTGCAATCGGCATGGTATGAA      |
| KRAS   | 12:25378648 | GCCTGTTTTGTGTCTACTGTTCTAGA      | GACAAAAGTTGTGGACAGGTTTTGA   |

### Intra-tumor heterogeneity

| Gene   | Position     | Forward primer sequence          | Reverse primer sequence        |
|--------|--------------|----------------------------------|--------------------------------|
| APC    | 5:112175390  | AGAATCAGCCAGGCACAAAG             | GCAATCGAACGACTCTCAAA           |
| TP53   | 17:7578406   | CAGCTGCTCACCATCGCTAT             | GTTTTGCCAACTGGCCAAGA           |
| APC    | 5:112175951  | CCAGTTCAGGAAAATGACAATGGGAA       | GGCATGGCAGAAATAATACATTCTTCTAGT |
| PIK3CA | 3: 178952103 | TGAGCAAGAGGCTTTGGAGT             | ATGCTGTTTATGGATTGTGC           |
| BRAF   | 7:140501343  | TTCTGTACTACAACGCTGGTGAAA         | GTCAGTTTCTAGAAAGTTTCTTGTGAGTT  |
| ERBB4  | 2:212248464  | CTTCAGGGAGAACTCAGAGAGGTA         | ACAACCCTGACTACTGGAACCA         |
| MCF2   | x:138697051  | TGAAGAATAAACTCAGTATTTACATCAAGAGT | AATTTGTGGTACCCACACCTGAAA       |
| WNK3   | x:54276057   | TCGTCAGTACGTGCTTAGCC             | CCATCAACCACATCCTTGTGT          |
| APC    | 5:112173729  | TGACACCAATCGACATGATGATAATAGG     | AATCCGCGTTCTCTCTCCAAA          |



**Supplementary Table 4.** Primers used for SnuPE sequencing.Inter-tumor heterogeneity

| <b>locus</b> | <b>SNuPE primer 5'-3''</b> |
|--------------|----------------------------|
| MMP17        | tggagcctggcgt              |
| MUC16        | agagatgtcaccc              |
| LRP2         | gcacagggcgag               |
| GRIA3        | ctctcaggtag                |
| ARID1A       | gcacccccagagc              |
| NOTCH3       | tctcacatagt                |
| HDAC2        | gctcctcctct                |
| KRas         | cagcagggtca                |
| KRas         | ttgaaacatcag               |
| CARD11       | atcgagatgggtg              |
| BMPR1A       | ctggatcatcttct             |
| GNAS         | gaagtcaggaca               |
| APC          | caagtcactctgg              |
| APC          | gtcatctgggaa               |
| TP53         | aggggccacgg                |
| TP53         | tgggagcttcat               |
| NRAS         | acaaggacagtt               |
| ERBB4        | tacctgcaggag               |
| CTNNB1       | aagccctcacga               |
| EPHA3        | ttggtgtgtaag               |
| LIFR         | ttgtttttatt                |
| LRRK2        | aaatcattttat               |
| PIK3CA       | agaaccagaca                |
| TIAM1        | aagcaagctgccc              |
| BRAF         | gtaaaaataggtg              |
| DLC1         | tgcaatgtagta               |
| PIK3CA       | gaaatcactgag               |
| FBXW7        | ccacttgtaac                |
| FBXW7        | gctccctaaaga               |
| TCF7L2       | ctgtatgtagc                |
| AMER1        | tactttgctca                |
| FBXW7        | cctcctgcat                 |
| TGFBR2       | gactgagtgctg               |
| POLE         | ctgatgctgaga               |
| EGFR         | tcaactccaaa                |
| TCF7L2       | agcaatgaacac               |
| FBXW7        | gagtggcatctc               |
| APC          | tcaactgctcat               |
| KDR          | ccaccagagatt               |
| KDR          | atccttggcac                |

|            |                          |
|------------|--------------------------|
| APC        | tccaacttctc              |
| APC        | tcgaacgactct             |
| POLE       | accgaggaaatg             |
| TP53_0894f | GGCTCCTGACCTGGAGTCTT     |
| TP53_0894r | CTCATCTTGGGCCTGTGTTATCTC |

Intra-tumor heterogeneity

| <b>locus</b>            | <b>SNUPE primer 5'-3''</b> |
|-------------------------|----------------------------|
| TP53_3739               | aggttgtgaggc               |
| APC_1391                | caaaagtgggtgct             |
| NOTCH3_8924             | acggaggagtgc               |
| ADAM29_8779             | caactgaggttg               |
| MCF2_9052 top strand    | ccttgtttagat               |
| MCF2_9052 bottom strand | tgggacaccattttt            |

**Supplementary Table 5.** Primers used for qPCR.

| <b>Gene</b> | <b>Primer name</b> | <b>Forward primer sequence</b> | <b>Reverse primer sequence</b> | <b>samples tested</b>          |
|-------------|--------------------|--------------------------------|--------------------------------|--------------------------------|
| Tp53        | Tp53.1             | GGCCACCTCTTACCGATTT            | CAGTAAGGAGATTCCCCGCC           | 3.2.2B, 3.3.4C, 3.4.4D, 3.6.7C |
| Tp53        | Tp53.2             | CTCTGTTGCTGCAGATCCGT           | GCCTCATTGAGCTCTCGGAA           |                                |
| MAP2K4      | MAP2K4.1           | GGGGAAGACTTGCTGCTAC            | GCCTCCTACCACGCAAAATG           | 3.2.2B, 3.3.4C, 3.4.4D, 3.6.7C |
| MAP2K4      | MAP2K4.2           | CCCACACATGTGAGTATTCTTGG        | ATCTTTGCTTGAGTTGAGCCTTT        |                                |
| MMP9        | MMP9.1             | CCGCTATGTTACTACTCGGG           | GGCCCCAGAGATTTGCGACTC          | 3.2.3A, 3.2.5C, 3.4.4A, 3.5.4D |
| MMP9        | MMP9.2             | GCAGACCATCCATGGGTCAA           | AAGGCGGAGACAGCACATTA           |                                |
| GNAS        | GNAS.1             | CCAGGCCAGTGATGTCATGT           | ATCTCATCCCTCTGCTGGGT           | 3.2.3A, 3.2.5C, 3.4.4A, 3.4.4C |
| GNAS        | GNAS.2             | CCCTACTACTCCAGCACACAG          | GGCCGAGTTGGGATGGATAG           |                                |
| EDEM2       | EDEM2.1            | TGAATTTGCCACCCTGAGCA           | TGAATTTGCCACCCTGAGCA           | 3.2.3D, 3.3.4A, 3.5.1D, 3.5.4C |
| EDEM2       | EDEM2.2            | CAGGACAGCGTGACTTTGA            | GCAGCCCTTACCTCGAATGT           |                                |
| SOX9        | SOX9.1             | CAAAGTTCTTGGGCTGCTCG           | CAGCTACCTCCCTCACCTCT           | 3.2.3A, 3.2.5C, 3.4.4A, 3.5.4D |
| SOX9        | SOX9.2             | AGCTTTGGTTTGTGTTTCGTGT         | GCTGGGAGGGAACAAGTGA            |                                |
| APC         | APC.1              | TCCCTGGAGTAAACTGCGG            | CCGGCTTCCATAAGAACGGA           | 3.2.2D, 3.4.4B, 3.5.1A, 3.5.4C |
| APC         | APC.2              | TTGGCCGAGTCTTGTAGTGC           | GCCTGCTAACATTCTGCGTT           |                                |
| SMAD4       | SMAD4.1            | CTTTGAGGGACAGCCATCGT           | CTTGGTGGATGCTGGATGGT           | 3.2.2B, 3.3.4C, 3.4.4D, 3.6.7C |
| SMAD4       | SMAD4.2            | GTTGTCCAGTGCATTGCAGG           | TGGGCATCTGGTGGCTAAAG           |                                |
| HDAC3       | HDAC3.1            | AGATGATCGTGAGTCCGCC            | TCCAGCCCACCTATCCCTAC           | 3.2.3D, 3.5.1B, 3.5.4C, 3.6.6A |
| HDAC3       | HDAC3.2            | ACCAGATCCGCCAGACAATC           | TGCAGGCACGTCATGAATCT           |                                |
|             |                    |                                |                                |                                |
| TERT        | TERT_1             | CCTACCGTGGCAGCTAGAAG           | CTGCATGGCCGGAAGTCTTA           | reference primer               |
| TERT        | TERT_2             | GGTTGTGGTGACGTTGCTTC           | CCAGGTTTGCAAGCTGACAC           | reference primer               |
| RPPH1       | RPPH1_1            | GGAGCTCAATATCGCGGGAC           | GTCACAGTAGGTGGCATCGT           | reference primer               |
| RPPH1       | RPPH1_2            | CAGGAACCGTAGGCTTTCGT           | TGGTGGTTTCCAAGTGCAT            | reference primer               |

**Supplementary Table 6.** Overview of SNV validation results for intra-tumor heterogeneity study. Several SNVs were not found at sufficient depth to be ‘called’ by the variant caller pipeline, we therefore validated their presence or absence using Sanger Sequencing (primer sequences can be found in table 3).

| Gene          | Position        | Sample          | Called | Result from Sanger |
|---------------|-----------------|-----------------|--------|--------------------|
| <b>APC</b>    | chr:5_112175390 | 3.1.1 (healthy) | no     | not present        |
|               |                 | 3.2.1C          | yes    | present            |
|               |                 | 3.3.1A          | yes    | present            |
|               |                 | 3.4.4B          | yes    | present            |
|               |                 | 3.5.1D          | yes    | present            |
|               |                 | 3.6.6B          | yes    | present            |
|               |                 | 3.2.3C          | no     | present            |
|               |                 | 3.3.4B          | no     | present            |
|               |                 | 3.5.3D          | no     | present            |
|               |                 | 3.5.4B          | no     | present            |
|               |                 | 3.6.7D          | no     | present            |
| <b>TP53</b>   | chr:17_7578406  | 3.1.1 (healthy) | no     | not present        |
|               |                 | 3.3.2C          | yes    | present            |
|               |                 | 3.3.3A          | yes    | present            |
|               |                 | 3.5.1B          | yes    | present            |
| <b>APC</b>    | chr:5_112175951 | 3.1.1 (healthy) | no     | not present        |
|               |                 | 3.3.2C          | yes    | not present        |
|               |                 | 3.2.4A          | no     | not present        |
|               |                 | 3.5.2C          | no     | not present        |
|               |                 | 3.4.4B          | no     | not present        |
|               |                 | 3.5.1A          | no     | not present        |
|               |                 | 3.6.6C          | no     | not present        |
|               |                 | 3.6.6D          | no     | not present        |
| <b>PIK3CA</b> | chr:3_178952103 | 3.1.1 (healthy) | no     | not present        |
|               |                 | 3.2.4C          | no     | not present        |
|               |                 | 3.2.5A          | no     | not present        |
|               |                 | 3.2.5B          | no     | not present        |
|               |                 | 3.3.1D          | no     | not present        |
|               |                 | 3.3.2D          | yes    | not present        |
|               |                 | 3.5.1B          | no     | not present        |
| <b>BRAF</b>   | chr:7_140501343 | 3.1.1 (healthy) | no     | not present        |
|               |                 | 3.2.1A          | no     | not present        |
|               |                 | 3.3.1C          | no     | not present        |
|               |                 | 3.4.4A          | no     | not present        |
|               |                 | 3.5.2C          | no     | not present        |

|              |                 |                 |     |             |
|--------------|-----------------|-----------------|-----|-------------|
| <b>ERBB4</b> | chr:2_212248464 | 3.1.1 (healthy) | no  | not present |
|              |                 | 3.4.4C          | no  | not present |
|              |                 | 3.5.2D          | no  | not present |
|              |                 | 3.5.3A          | yes | not present |
|              |                 | 3.6.7C          | no  | not present |
|              |                 | 3.5.3C          | yes | not present |
|              |                 | 3.6.6C          | yes | not present |
|              |                 | 3.6.6D          | yes | not present |
|              |                 |                 |     |             |
| <b>MCF2</b>  | chr:X_138697051 | 3.1.1 (healthy) | no  | not present |
|              |                 | 3.5.3A          | yes | not present |
|              |                 |                 |     |             |
| <b>WNK3</b>  | chr:X_54276057  | 3.1.1 (healthy) | no  | not present |
|              |                 | 3.3.3A          | no  | not present |
|              |                 | 3.3.4B          | no  | not present |
|              |                 | 3.5.1A          | no  | not present |
|              |                 | 3.5.2C          | no  | not present |
|              |                 | 3.5.3A          | yes | not present |
|              |                 |                 |     |             |
| <b>APC</b>   | chr:5_112173729 | 3.1.1 (healthy) | no  | not present |
|              |                 | 3.5.3D          | yes | not present |

**Supplementary Table 7.** Data used for the visualization of the screenshots in Fig. 6b - d. Each table contains measured data of copy number variation for one gene from our experiments. Columns correlate to regions A to D and rows correspond to the slice planes.

| clusters | A | B | C | D |
|----------|---|---|---|---|
| Plane 1  | 2 | 2 | 1 | 2 |
| Plane 2  | 2 | 2 | 2 | 2 |
| Plane 3  | 1 | 2 | 1 | 1 |
| Plane 4  | 1 | 1 | 1 | 1 |
| Plane 5  | 1 | 1 | 1 | 2 |

| BRCA2   | A    | B    | C    | D    |
|---------|------|------|------|------|
| Plane 1 | 1    | 1    | 1.38 | 1    |
| Plane 2 | 1    | 1    | 1    | 2.94 |
| Plane 3 | 1.49 | 1.5  | 1.66 | 1.36 |
| Plane 4 | 1.45 | 1.37 | 1    | 1    |
| Plane 5 | 1.47 | 1.59 | 1.69 | 1.45 |

| Card11  | A    | B    | C | D    |
|---------|------|------|---|------|
| Plane 1 | 1.42 | 1.51 | 1 | 1.29 |
| Plane 2 | 1.43 | 1    | 1 | 1.51 |
| Plane 3 | 1    | 1.29 | 1 | 1    |
| Plane 4 | 1    | 1    | 1 | 1    |
| Plane 5 | 1    | 1    | 1 | 1    |

| MMP9    | A    | B    | C    | D    |
|---------|------|------|------|------|
| Plane 1 | 1.87 | 2.13 | 1.55 | 1.75 |
| Plane 2 | 2.04 | 1.77 | 1.65 | 2.19 |
| Plane 3 | 1.43 | 1.9  | 1    | 1.6  |
| Plane 4 | 1.5  | 1.54 | 1    | 1.54 |
| Plane 5 | 1.56 | 1    | 1    | 1.54 |
